# Supplementary material for: More than the usual suspect: diversity of pollinators of chayote (Sechium edule) at high elevations in Chiapas, Mexico
Source: Springer Nature journal article supplement (doi:10.1007/s13592-021-00898-y), 2021-11-19
Supplement: MOESM1 [file 13592_2021_898_MOESM1_ESM.pdf]

More than the usual suspect: diversity of pollinators of Chayote (*Sechium edule*) in high elevations in Chiapas, Mexico. **Apidologie**

Angélica Elizabeth Martínez-Bauer<sup>1\*</sup>, Rémy Vandame<sup>1</sup> and Gerardo Cerón-Martínez<sup>2</sup>

1. El Colegio de la Frontera Sur, Departamento de Agricultura, Sociedad y Ambiente, San Cristóbal de Las Casas, Chiapas, Mexico. \*corresponding autor: [angelica.e.mtz.bauer@gmail.com](mailto:angelica.e.mtz.bauer@gmail.com)  
AEMB\_ORCID number: 0000-0001-6989-8427
2. Department of Zoology, University of Oxford, OX1 3SZ, Oxford, UK.  
GCM\_ORCID number: 0000-0002-6352-0658

### Online Resource 1

#### Figures

**Online Resource 1 Figure 1.** Flower visitors collected directly on *Sechium edule* flowers. A) *Hylaeus sp1* (bee) with 4 visible chayote pollen grains, probably due to jar contamination; B) *Agelaia sp1*. (wasp) with more than 20 chayote pollen grains covering the entire body.

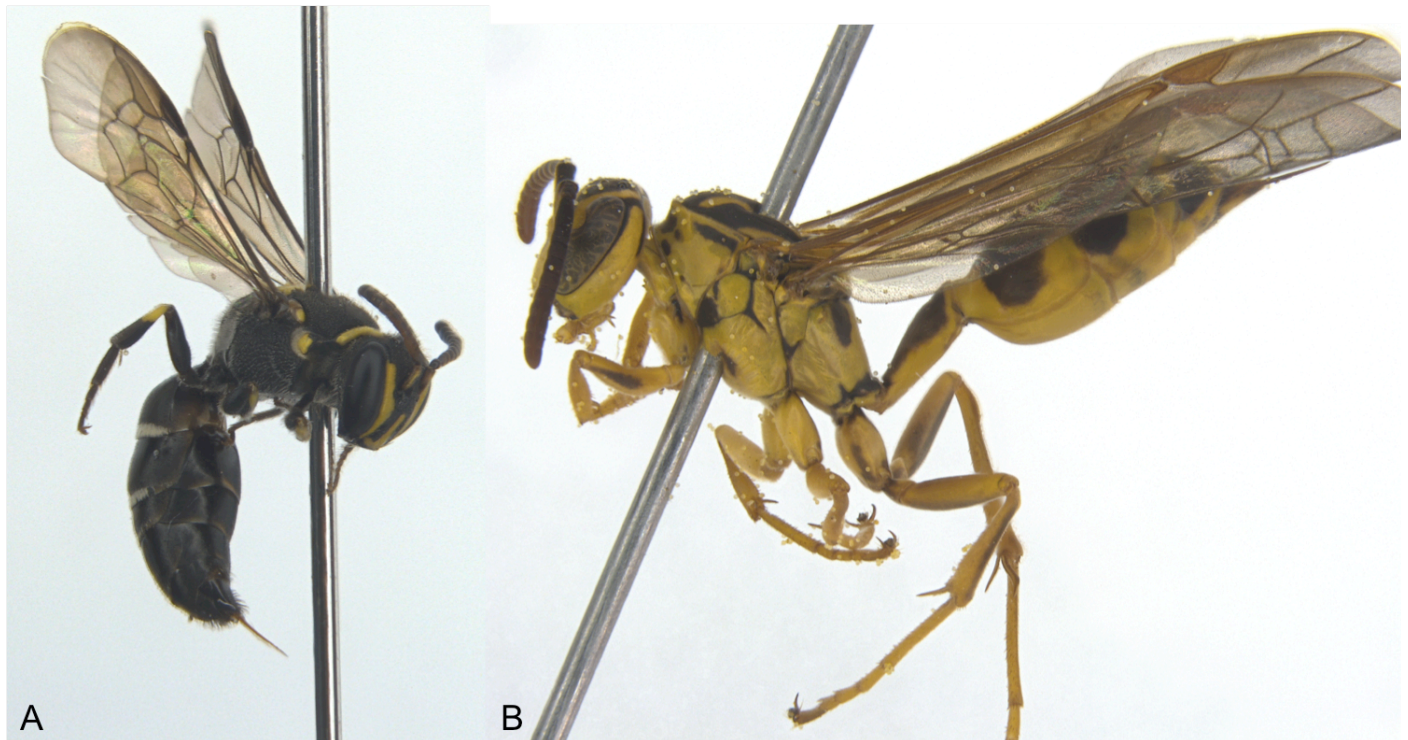

**Online Resource 1 Figure 2.** *Sechium edule* pollen loads for 4 genera of bees and 5 genera of wasps, based on a DAFOR scale (Dominant  $\geq 50$  grains, Abundant 20 to 50, Frequent 10 to 20, Occasional 3 to 10 and Rare 1 to 3 grains) as a proxy to determine pollen transport efficiency. We used median value of pollen abundances: D = 80, A = 41, F = 13, O = 6 and R = 1.

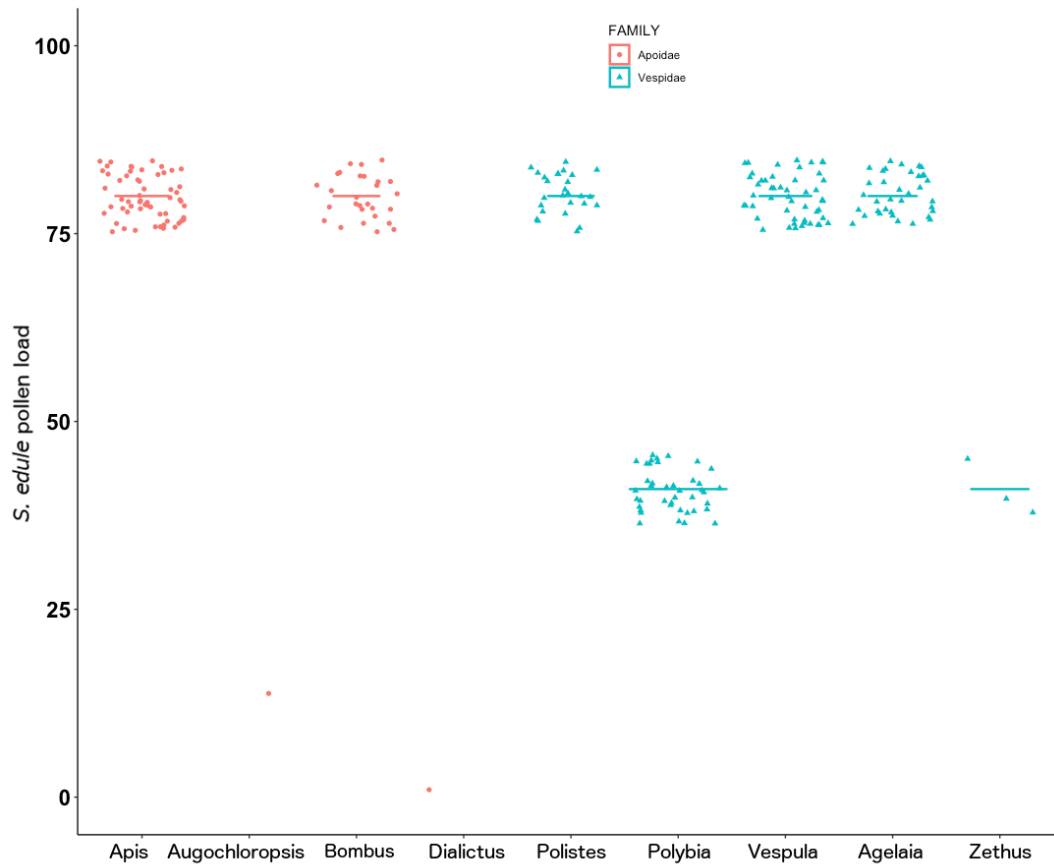

## Tables

**Online Resource 1 Table I.** Results from the linear mixed effects model (negative binomial distribution), with visitation rate/hr as the response variable and insect identity and plant size as explanatory variables and site as random factor.

Fixed effects:

|                         | Estimate | Std. Error | z value | Pr(> z ) |     |
|-------------------------|----------|------------|---------|----------|-----|
| (Intercept)             | 3.16297  | 0.12601    | 25.101  | < 2e-16  | *** |
| (bee) Augochloropsis    | -2.22052 | 0.80231    | -2.768  | 0.005646 | **  |
| (bee) Bombus            | -0.67024 | 0.17127    | -3.913  | 9.10E-05 | *** |
| (bee) Dialictus         | -1.52692 | 0.7202     | -2.12   | 0.033995 | *   |
| (fly) Diptera msp 2     | -1.93284 | 1.70715    | -1.132  | 0.257549 |     |
| (fly) Diptera msp 4     | -1.80036 | 0.31629    | -5.692  | 1.25E-08 | *** |
| (fly) Diptera msp 5     | -1.91936 | 0.51295    | -3.742  | 0.000183 | *** |
| (fly) Bibionidae        | -3.10325 | 3.53932    | -0.877  | 0.3806   |     |
| (fly) Dolichop          | -1.71456 | 0.79829    | -2.148  | 0.031729 | *   |
| (fly) Syrphi            | -1.73712 | 0.64439    | -2.696  | 0.007023 | **  |
| (wasp) Polistes         | -0.69728 | 0.16839    | -4.141  | 3.46E-05 | *** |
| (wasp) Polybia          | -1.27849 | 0.15132    | -8.449  | < 2e-16  | *** |
| (wasp) Vespula          | -0.65837 | 0.14353    | -4.587  | 4.50E-06 | *** |
| (wasp) Agelaia          | -0.36668 | 0.16384    | -2.238  | 0.025225 | *   |
| (wasp) Zethus           | -1.63402 | 0.54038    | -3.024  | 0.002496 | **  |
| Plant Size              | 0.28088  | 0.12075    | 2.326   | 0.020014 | *   |
| Bombus : Plant Size     | -0.14983 | 0.16213    | -0.924  | 0.355425 |     |
| Dip 2 : Plant Size      | -0.7772  | 2.87625    | -0.27   | 0.786997 |     |
| Dip 4 : Plant Size      | -0.25559 | 0.316      | -0.809  | 0.418616 |     |
| Dip 5: Plant Size       | -0.20536 | 0.3782     | -0.543  | 0.587136 |     |
| Bibionidae : Plant Size | -1.39251 | 2.94891    | -0.472  | 0.636776 |     |
| Syrphi : Plant Size     | -0.32963 | 0.59382    | -0.555  | 0.578828 |     |
| Polistes : Plant Size   | 0.01519  | 0.19127    | 0.079   | 0.936696 |     |
| Polybia 1: Plant Size   | -0.52412 | 0.14621    | -3.585  | 0.000337 | *** |
| Vespula : Plant Size    | -0.4485  | 0.14004    | -3.203  | 0.001361 | **  |
| Agelaia : Plant Size    | -0.39441 | 0.15706    | -2.511  | 0.012032 | *   |
| Zethus : Plant Size     | 0.22527  | 0.40706    | 0.553   | 0.579986 |     |

**Online Resource 1 Table II.** Mean visitation rates (visits/hr) of Chayote flower visitors by plant size (measured in square meters of area covered).

|                            | 13m <sup>2</sup><br>(PI) | 20m <sup>2</sup><br>(FL) | 22m <sup>2</sup><br>(AL) | 25m <sup>2</sup><br>(PI) | 30m <sup>2</sup><br>(SA) | 50m <sup>2</sup><br>(VH) | 64m <sup>2</sup><br>(SA) |
|----------------------------|--------------------------|--------------------------|--------------------------|--------------------------|--------------------------|--------------------------|--------------------------|
| <b>BEES</b>                |                          |                          |                          |                          |                          |                          |                          |
| <i>Apis mellifera</i>      | 2.5                      | 2.9                      | 0.9                      | 0.7                      | 1                        | 0.7                      | 2.8                      |
| <i>Bombus</i> sp           |                          | 0.3                      |                          | 0.9                      | 0.3                      |                          | 1                        |
| Other native Bees          |                          |                          |                          |                          |                          |                          | 0.4                      |
| <b>WASPS</b>               |                          |                          |                          |                          |                          |                          |                          |
| <i>Vespula squamosa</i>    |                          | 0.5                      | 1.8                      | 0.2                      | 1                        | 0.6                      | 0.7                      |
| <i>Agelaia</i> sp 1        | 1                        | 0.3                      | 0.3                      | 0.3                      | 1.9                      | 0.8                      | 0.9                      |
| <i>Polybia msp 1</i>       |                          | 0.6                      | 1                        | 0.4                      | 0.6                      | 0.3                      | 0.3                      |
| <i>Polistes instabilis</i> |                          |                          | 1.2                      | 0.6                      | 0.6                      | 1                        | 0.9                      |
| <b>DIPTERA</b>             |                          |                          |                          |                          |                          |                          |                          |
| all diptera                | 1                        | 0.3                      |                          | 0.3                      | 0.3                      | 0.2                      | 0.3                      |
| <b>COLEOPTERA</b>          |                          |                          |                          |                          |                          |                          |                          |
| all coleoptera             |                          |                          |                          |                          |                          |                          | 0.3                      |

**Online Resource 1 Table III.** List of plant species identified in pollen load samples.

| Family         | Genus or species           | Pollen Code | Occurrence in pollen loads |
|----------------|----------------------------|-------------|----------------------------|
| Amaranthaceae  |                            | Amara_01    | 39                         |
| Apiaceae       | <i>Coriandrum sp.</i>      | Apiac_01    | 9                          |
| Apiaceae       | <i>Foeniculum vulgare</i>  | Apiac_02    | 2                          |
| Brassicaceae   | <i>Brassica sp.</i>        | Brassi_01   | 13                         |
| Brassicaceae   | <i>Raphanus sp.</i>        | Brassi_03   | 4                          |
| Campanulaceae  | <i>Lobelia laxiflora</i>   | Campa_01    | 2                          |
| Commelinaceae  | <i>Tinantia sp.</i>        | Comme_01    | 9                          |
| Compositae     |                            | Compo_01    | 3                          |
| Compositae     |                            | Compo_03    | 3                          |
| Compositae     |                            | Compo_05    | 3                          |
| Compositae     |                            | Compo_06    | 2                          |
| Compositae     |                            | Compo_07    | 2                          |
| Compositae     |                            | Compo_08    | 4                          |
| Compositae     |                            | Compo_09    | 4                          |
| Compositae     |                            | Compo_11    | 46                         |
| Compositae     |                            | Compo_12    | 47                         |
| Compositae     |                            | Compo_13    | 1                          |
| Compositae     |                            | Compo_14    | 2                          |
| Compositae     |                            | Compo_15    | 27                         |
| Compositae     |                            | Compo_16    | 3                          |
| Compositae     |                            | Compo_18    | 1                          |
| Compositae     |                            | Compo_19    | 1                          |
| Compositae     |                            | Compo_20    | 78                         |
| Compositae     |                            | Compo_22    | 12                         |
| Compositae     |                            | Compo_23    | 1                          |
| Compositae     |                            | Compo_24    | 14                         |
| Compositae     | <i>Taraxacum sp.</i>       | Compo_25    | 35                         |
| Compositae     | <i>Taraxacum sp.</i>       | Compo_27    | 1                          |
| Compositae     | <i>Conyza bonariensis</i>  | Compo_28    | 1                          |
| Convolvulaceae | <i>Ipomoea</i>             | Convo_01    | 2                          |
| Cucurbitaceae  | <i>Cucurbita sp.</i>       | Cucur_01    | 26                         |
| Cucurbitaceae  | <i>Sechium edule</i>       | Cucur_Cha   | 113                        |
| Cucurbitaceae  | <i>Cyclanthera sp.</i>     | Cucur_02    | 72                         |
| Iridiaceae     | <i>Crocasmia sp.</i>       | Iridi_01    | 1                          |
| Lamiaceae      | <i>Prunella sp.</i>        | Laima_01    | 2                          |
| Leguminosae    | <i>Phaseolus coccineus</i> | Legumi_01   | 19                         |
| Leguminosae    | <i>Medicago sp.</i>        | Legumi_03   | 2                          |
| Malvaceae      |                            | Malvac_01   | 3                          |
| Malvaceae      |                            | Malvac_02   | 1                          |
| Onagraceae     | <i>Lopezia racemosa</i>    | Onagra_01   | 20                         |
| Onagraceae     | <i>Oenothera sp.</i>       | Onagra_02   | 3                          |
| Oxaliaceae     | <i>Oxalis sp.</i>          | Oxali_01    | 2                          |

|              |                           |           |    |
|--------------|---------------------------|-----------|----|
| Pinaceae     | <i>Pinus</i>              | Pinac_01  | 34 |
| Poligonaceae | <i>Rumex sp.</i>          | Poligo_01 | 2  |
| Solanaceae   | <i>Brugmansia sp.</i>     | Solan_01  | 5  |
| Solanaceae   | <i>Solanum americanum</i> | Solan_03  | 64 |
| Solanaceae   | <i>Solanum</i>            | Solan_04  | 35 |
| Solanaceae   | <i>Physalis sp.</i>       | Solan_Tom | 25 |
| Undetermined | NA_ID                     | SinID_04  | 1  |
| Undetermined | NA_ID                     | SinID_05  | 98 |
| Undetermined | NA_ID                     | SinID_06  | 2  |
| Undetermined | NA_ID                     | SinID_08  | 1  |
| Undetermined | NA_ID                     | SinID_09  | 16 |
| Undetermined | NA_ID                     | SinID_10  | 12 |
| Undetermined | NA_ID                     | SinID_11  | 2  |
| Undetermined | NA_ID                     | SinID_13  | 3  |
| Undetermined | NA_ID                     | SinID_15  | 2  |
| Undetermined | NA_ID                     | SinID_16  | 1  |
| Undetermined | NA_ID                     | SinID_18  | 8  |
| Undetermined | NA_ID                     | SinID_24  | 3  |
| Undetermined | NA_ID                     | SinID_26  | 14 |
| Undetermined | NA_ID                     | SinID_29  | 1  |
| Undetermined | NA_ID                     | SinID_31  | 1  |
| Undetermined | NA_ID                     | SinID_33  | 3  |
| Undetermined | NA_ID                     | SinID_34  | 2  |
| Undetermined | NA_ID                     | SinID_36  | 2  |
| Undetermined | NA_ID                     | SinID_38  | 1  |
| Undetermined | NA_ID                     | SinID_40  | 3  |
| Undetermined | NA_ID                     | SinID_42  | 1  |
| Undetermined | NA_ID                     | SinID_47  | 1  |
| Undetermined | NA_ID                     | SinID_48  | 2  |

**Online Resource 1 Table IV.** Results from the generalized linear model with fruit set as the response variable and visitation rate and insect identity as explanatory variables.

Coefficients:

|                           | Estimate   | Std. Error | t value | Pr(> t ) |     |
|---------------------------|------------|------------|---------|----------|-----|
| (Intercept)               | 0.1328278  | 0.0154529  | 8.596   | 1.29E-15 | *** |
| Visit_Rate/hr             | -0.0003793 | 0.000472   | -0.804  | 0.4224   |     |
| Bombus                    | -0.0104846 | 0.0301589  | -0.348  | 0.7284   |     |
| Polistes                  | -0.0030119 | 0.0279985  | -0.108  | 0.9144   |     |
| Polybia 1                 | 0.0054864  | 0.0236442  | 0.232   | 0.8167   |     |
| Vespula                   | -0.0421964 | 0.0221307  | -1.907  | 0.0578   | .   |
| Agelaia                   | -0.0235096 | 0.0269937  | -0.871  | 0.3847   |     |
| Visit_Rate/hr : Bombus    | 0.0048345  | 0.0020272  | 2.385   | 0.0179   | *   |
| Visit_Rate/hr : Polistes  | -0.0008551 | 0.0015919  | -0.537  | 0.5917   |     |
| Visit_Rate/hr : Polybia 1 | 0.0023279  | 0.00172    | 1.353   | 0.1772   |     |
| Visit_Rate/hr : Vespula   | 0.0025149  | 0.0009757  | 2.577   | 0.0106   | *   |
| Visit_Rate/hr : Agelaia   | -0.0003788 | 0.0012741  | -0.297  | 0.7665   |     |

**Online Resource 2.** DAFOR, pollen load data: scale Dominant  $\geq 50$  grains, Abundant 20 to 50, Frequent 10 to 20, Occasional 3 to 10 and Rare 1 to 3 grains.

Available as Microsoft Excel spreadsheet (xlsx extension).
